# Supplementary material for: The RAB39B p.G192R mutation causes X-linked dominant Parkinson’s disease
Source: Springer Nature journal article supplement (doi:10.1186/s13024-015-0045-4), 2015-09-23

**A****p.A143G**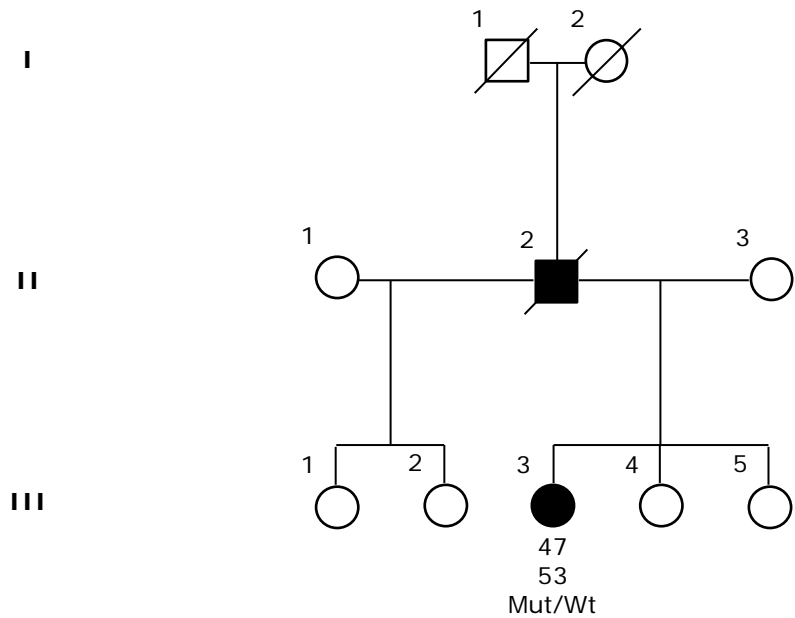**B****p.R209del**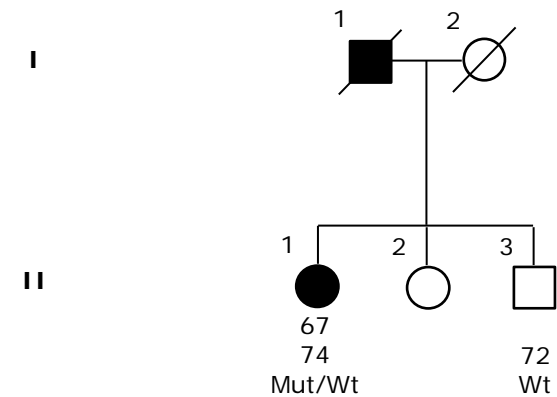

Supplement: MOESM1 [file 9776490]
